# Supplementary material
Source: Research Square preprint supplement (doi:10.21203/rs.3.rs-9310173/v1)
Supplement: Supplementary file 1 [file 056958f621f52671d469455a.docx]

**Supplementary Table 1. Correlation Between BMO Diameter and Ocular Parameters**

**PHOMS-Positive Eyes (n=23) and Healthy Controls (n=36)**

| **Parameter** | **PHOMS Eyes r** | **p value** | **Control Eyes r** | **p value** |
| --- | --- | --- | --- | --- |
| Optic disc area | 0.243 | 0.348 | **0.675** | **<0.001** |
| Average GCC thickness | 0.404 | 0.056 | 0.181 | 0.291 |
| Radial peripapillary capillary density | −0.068 | 0.762 | −0.172 | 0.316 |
| Global RNFL thickness | 0.025 | 0.909 | 0.280 | 0.098 |

Footnote: Pearson or Spearman correlation analysis was applied according to data distribution.
