# Supplementary material
Source: Research Square preprint supplement (doi:10.21203/rs.3.rs-9310173/v1)
Supplement: Supplementary file 2 [file 3c20eb0c28ad151ec5c7348a.docx]

# Supplementary Table 2

**Correlation Between Spherical Equivalent and Ocular Parameters**

| **Parameter** | **PHOMS Eyes r** | **p value** | **Control Eyes r** | **p value** |
| --- | --- | --- | --- | --- |
| BMO diameter† | 0.257 | 0.236 | 0.357 | 0.095 |
| Maximum PHOMS diameter‡ | 0.151 | 0.492 | – | – |

**Footnote**

† Pearson correlation analysis.
‡ Spearman rank correlation analysis.

BMO: Bruch’s membrane opening.
