# Supplementary material
Source: Research Square preprint supplement (doi:10.21203/rs.3.rs-9310173/v1)
Supplement: Supplementary file 3 [file c100d2eefca91e0addfd25a7.docx]

**Supplementary Table 5. Sectoral Structural and Vascular Parameters Across Groups**

|  | GRUP | | | px |
| --- | --- | --- | --- | --- |
| Hasta ODD Var | Hasta ODD Yok | Sağlıklı |
| SE | 0,59 ± 3,21a | -2,21 ± 2,51b | -0,42 ± 1,20a | **0,002** |
| BMO | 1,74 ± 0,37a | 1,58 ± 0,25a | 1,43 ± 0,15b | **<0,001** |
| SCP WHOLE | 49,32 ± 1,65 | 49,21 ± 1,21 | 49,51 ± 1,33 | 0,507 |
| SCP FOVEA | 31,05 ± 4,79 | 32,29 ± 5,79 | 30,73 ± 5,43 | 0,554 |
| SCP PARAFOEVA | 50,28 ± 1,83 | 49,57 ± 2,02 | 50,48 ± 1,79 | 0,123 |
| SCP PERİFOEVA | 49,51 ± 1,39 | 49,24 ± 1,47 | 49,42 ± 1,52 | 0,761 |
| DCP WHOLE | 52,50 ± 1,95 | 52,62 ± 1,75 | 52,85 ± 1,70 | 0,676 |
| DCP FOVEA | 30,05 ± 4,53a | 33,74 ± 4,40b | 29,89 ± 6,37a | **0,006** |
| DCP PARAFOEVA | 53,96 ± 1,12 | 54,05 ± 1,00 | 53,82 ± 1,11 | 0,589 |
| DCP PERİFOVEA | 53,17 ± 1,51 | 53,07 ± 1,49 | 53,40 ± 1,89 | 0,645 |
| FAZ | 0,23 ± 0,09 | 0,20 ± 0,08 | 0,25 ± 0,10 | 0,144 |
| FD | 53,76 ± 5,12 | 52,87 ± 6,76 | 53,63 ± 3,95 | 0,871 |
| FC 1 mm | 2,19 ± 0,33 | 2,25 ± 0,22 | 2,23 ± 0,24 | 0,761 |
| FC 3 mm | 20,30 ± 1,31a | 21,41 ± 1,19b | 20,66 ± 1,42ab | **0,006** |
| GCC Superior | 106,86 ± 7,95 | 102,38 ± 5,67 | 102,24 ± 5,99 | 0,052 |
| GCC Inferior | 107,81 ± 8,53 | 106,81 ± 6,54 | 106,06 ± 6,48 | 0,690 |
| FLV | 1,10 ± 1,94 | 0,65 ± 0,66 | 0,34 ± 0,45 | **0,010** |
| GLV | 2,62 ± 3,28 | 3,02 ± 1,92 | 2,89 ± 2,41 | 0,866 |
| RPC Nasalsuperior | 47,65 ± 3,63 | 47,47 ± 3,17 | 48,84 ± 3,12 | 0,082 |
| RPC Nasalinferior | 49,36 ± 3,61ab | 47,59 ± 3,47a | 50,11 ± 3,60b | **0,006** |
| RPC Inferonasal | 48,85 ± 3,57 | 47,65 ± 4,05 | 47,08 ± 3,66 | 0,106 |
| RPC Inferotemporal | 51,83 ± 4,10 | 51,46 ± 2,75 | 52,43 ± 3,55 | 0,296 |
| RPC Temporalinferior | 56,11 ± 2,59 | 56,82 ± 3,17 | 55,79 ± 2,85 | 0,229 |
| RPC Temporalsuperior | 56,49 ± 2,91 | 58,08 ± 3,00 | 57,31 ± 2,72 | 0,114 |
| RPC Superotemporal | 49,77 ± 3,49 | 49,92 ± 3,67 | 51,33 ± 3,81 | 0,066 |
| RPC Superonasal | 45,73 ± 3,57 | 45,93 ± 3,97 | 46,50 ± 3,95 | 0,636 |
| RNFL Nasalsuperior | 123,46 ± 46,91a | 77,57 ± 17,40b | 90,85 ± 13,57c | **<0,001** |
| RNFL Nasalinferior | 99,11 ± 47,56a | 62,73 ± 18,69b | 69,66 ± 12,66b | **<0,001** |
| RNFL Inferonasal | 171,14 ± 53,15a | 107,03 ± 26,50b | 113,58 ± 24,03b | **<0,001** |
| RNFL Inferotemporal | 183,34 ± 46,71a | 159,57 ± 30,33a | 139,11 ± 17,30b | **<0,001** |
| RNFL Temporalinferior | 82,28 ± 25,51a | 79,54 ± 30,00a | 63,63 ± 12,50b | **<0,001** |
| RNFL Temporalsuperior | 84,11 ± 27,61a | 73,19 ± 20,40ab | 62,88 ± 7,82b | **<0,001** |
| RNFL Superotemporal | 158,34 ± 51,88a | 143,92 ± 24,66a | 122,43 ± 20,31b | **<0,001** |
| RNFL Superonasal | 155,94 ± 70,01a | 113,78 ± 25,53b | 117,13 ± 16,17b | **0,011** |
| Disc area | 2,16 ± 0,90 | 1,78 ± 0,39 | 1,85 ± 0,31 | 0,414 |

Group comparisons were performed using generalized estimating equations (GEE) to account for inter-eye correlation. Bonferroni correction was applied for multiple comparisons. Continuous variables are presented as mean ± standard deviation. Different superscript letters indicate statistically significant differences between groups.

ODD: optic disc drusen
SE: spherical equivalent
BMO: Bruch’s membrane opening
SCP: superficial capillary plexus
DCP: deep capillary plexus
FAZ: foveal avascular zone
FD: flow density
FC: coriocapillaris flow area (1 mm and 3 mm)
GCC: ganglion cell complex
FLV: focal loss volume
GLV: global loss volume
RPC: radial peripapillary capillary
RNFL: retinal nerve fiber layer
